# Supplementary material for: Triggering of microearthquakes in Iceland by volatiles released from a dyke intrusion
Source: Oxford University Press journal article supplement (doi:10.1093/gji/ggt184), 2013-06-03

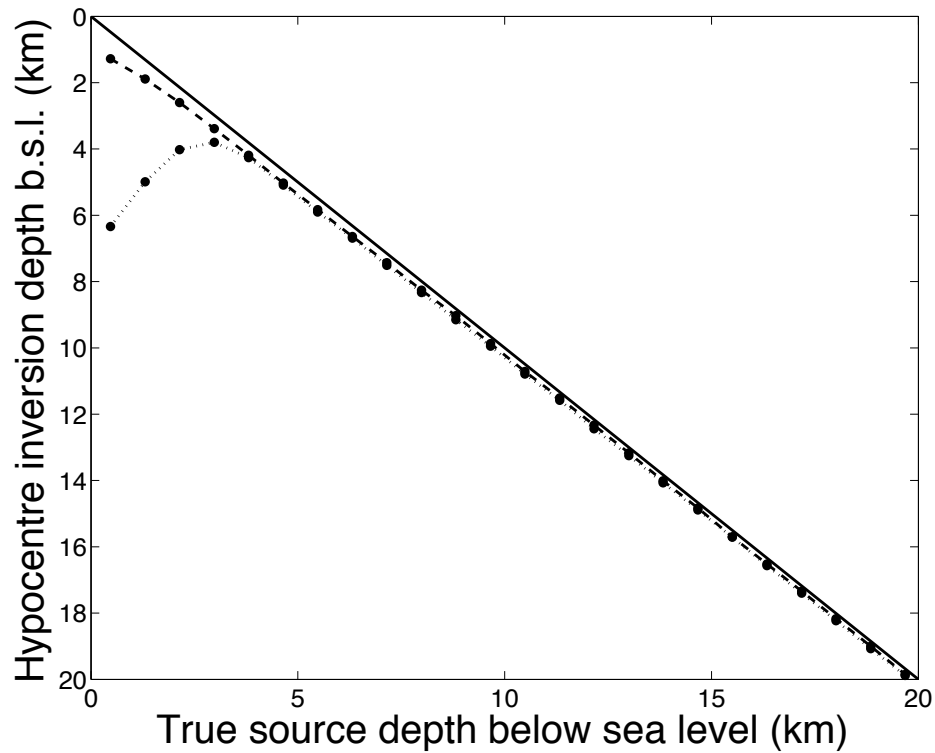

**Supplementary Figure 1.** Synthetic tests for accuracy of hypocentre depth recovery after location using HypoInverse-2000 (Klein 2002). The dotted line represents the depths output by HypoInverse-2000 versus the input synthetic depths when no distance weighting is applied to the arrivals. The dashed line represents the depths output by HypoInverse-2000 versus the input synthetic depths when distance weighting is applied to the arrivals. The HypoInverse-2000 distance weighting parameter, *DIS*, was set to 3 10 1 3. This means that all stations within a distance of 10 km from the synthetic epicentre (65.08°N, 16.27°W) are given full weight whereas stations further away than 30 km are given zero weight. A cosine taper is applied between these distances. The solid line depicts perfect correspondence between input synthetic depth and output Hypoinverse-2000 depth. This test was performed using the 2008–2009 network of Cambridge and IMO seismic stations.

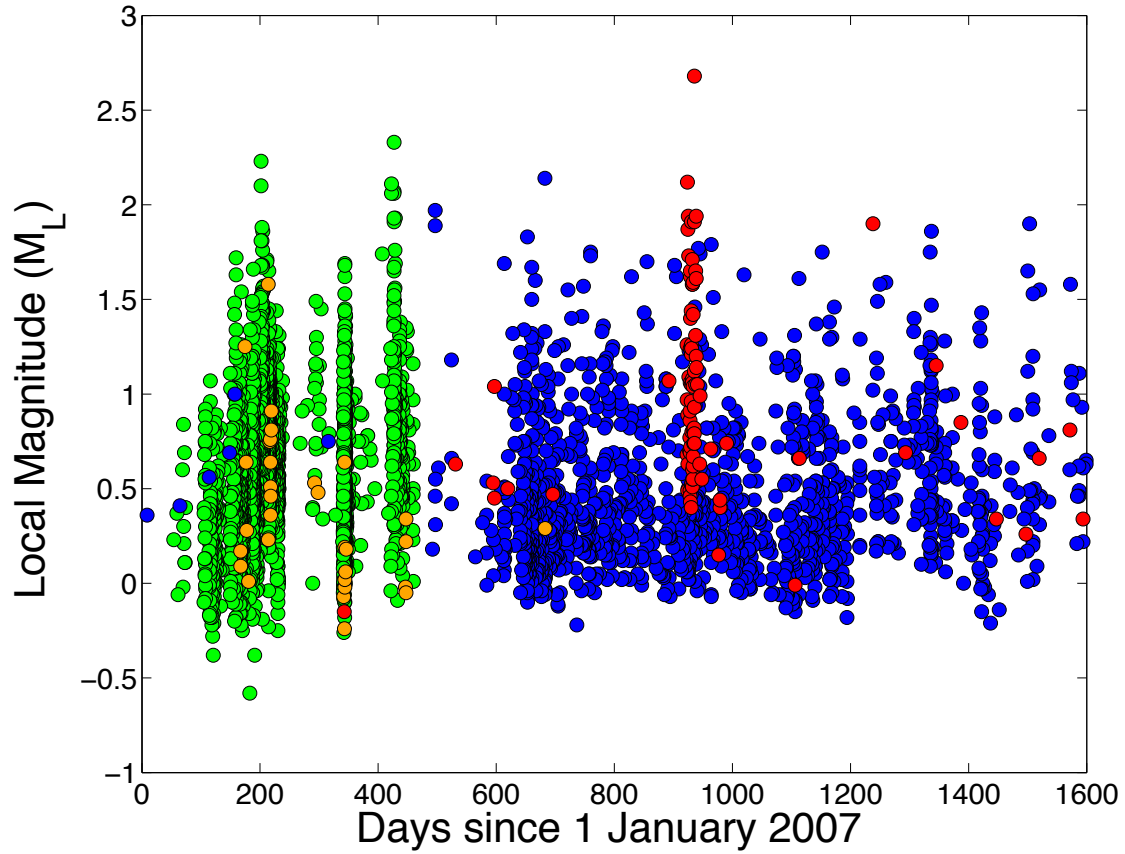

**Supplementary Figure 2.** Local magnitudes determined by the Icelandic Meteorological Office as a function of occurrence time for microseismic events in the reduced CMM catalogue (see main text for a description of the catalogue). Events and colour scheme are the same as for Fig. 4 in the main text. Green points represent deep events associated with the movement of melt within the dyke, orange points are events from cluster A overhead of the dyke, blue points are from cluster B at the brittle-ductile boundary, and red points are from cluster C at shallow depths.

(a) Cluster A

20070802 2144  
Z= 1.83 M= 0.00

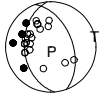

20070806 2135  
Z= 3.47 M= 0.00

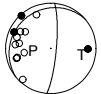

20070806 2137  
Z= 3.31 M= 0.00

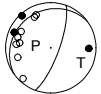

20070806 2142  
Z= 3.49 M= 0.00

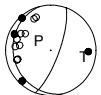

20070807 2358  
Z= 2.78 M= 0.00

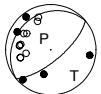

20070807 2359  
Z= 2.69 M= 0.00

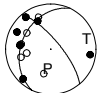

**Supplementary Figure 3.** Fault plane solutions output by *FPFIT* for all manually located events in (a) cluster A directly overhead of the dyke, (b) cluster B at the brittle-ductile boundary (see following pages), and (c) cluster C at depths near to the surface (see following pages). Events are labelled by date in YYYYMMDD HHMM format. Z corresponds to the depth of the event. M corresponds to the magnitude, which we have not included here; hence, this value is listed as zero.

# (b-1) Cluster B

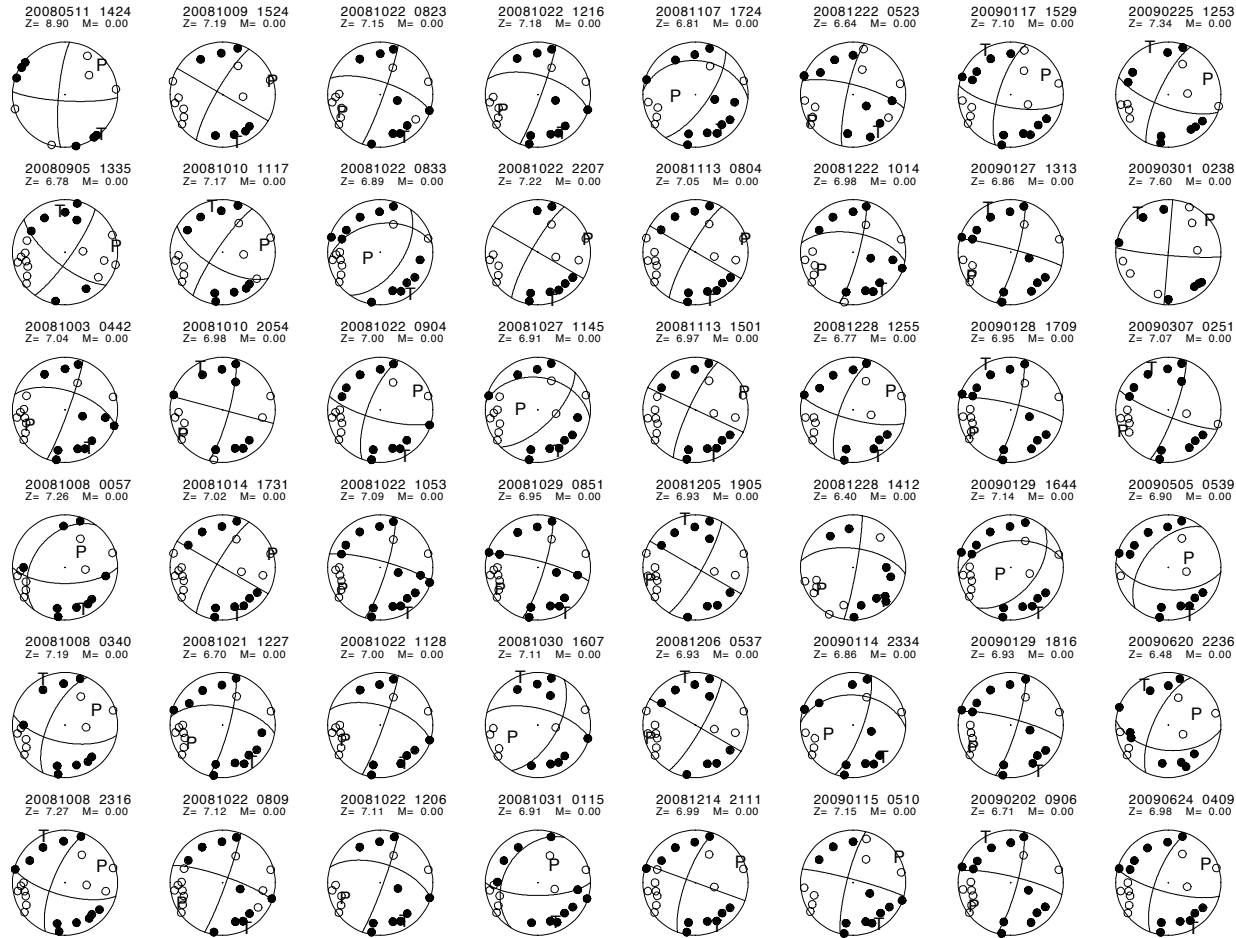

# (b-2) Cluster B

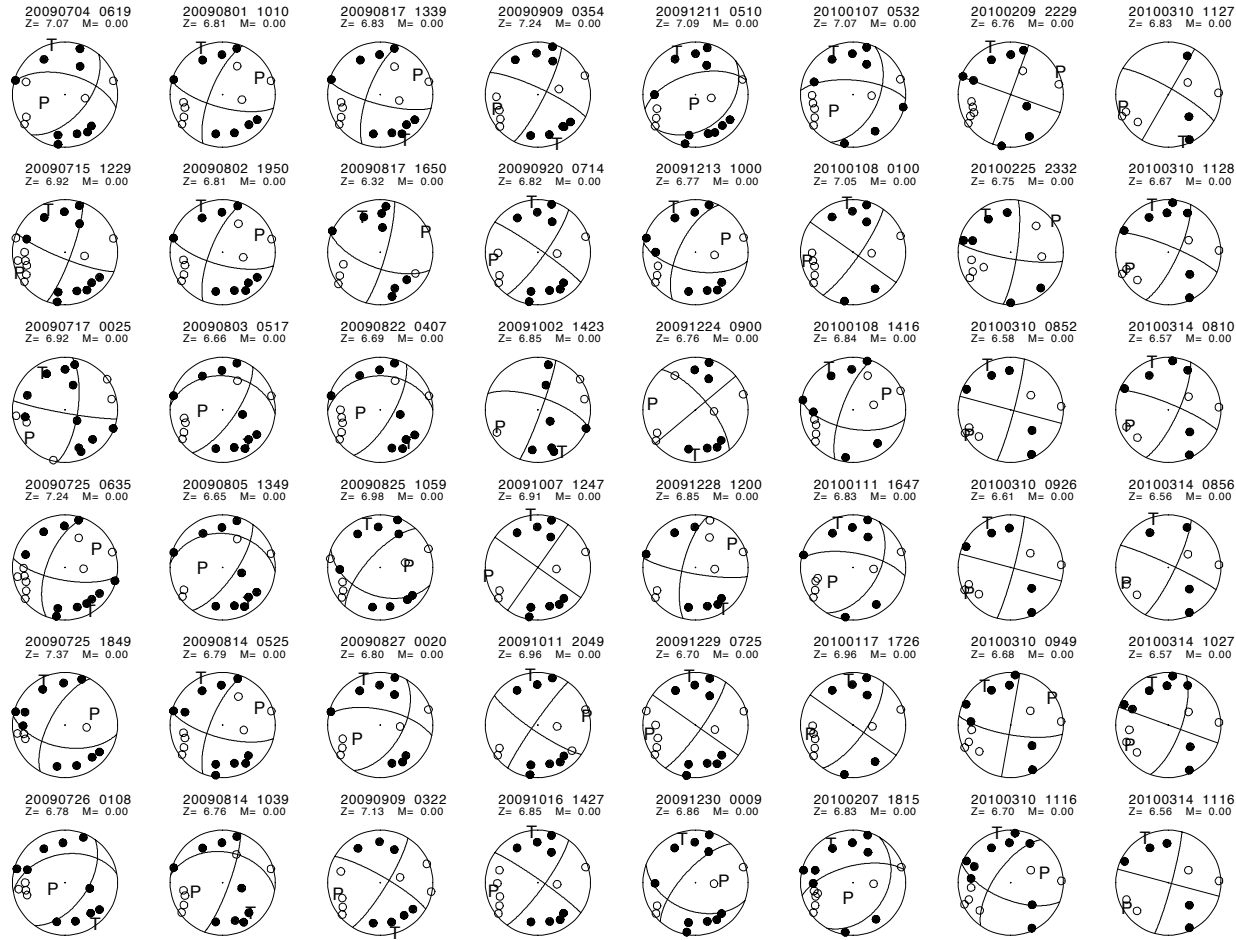

(b-3) Cluster B

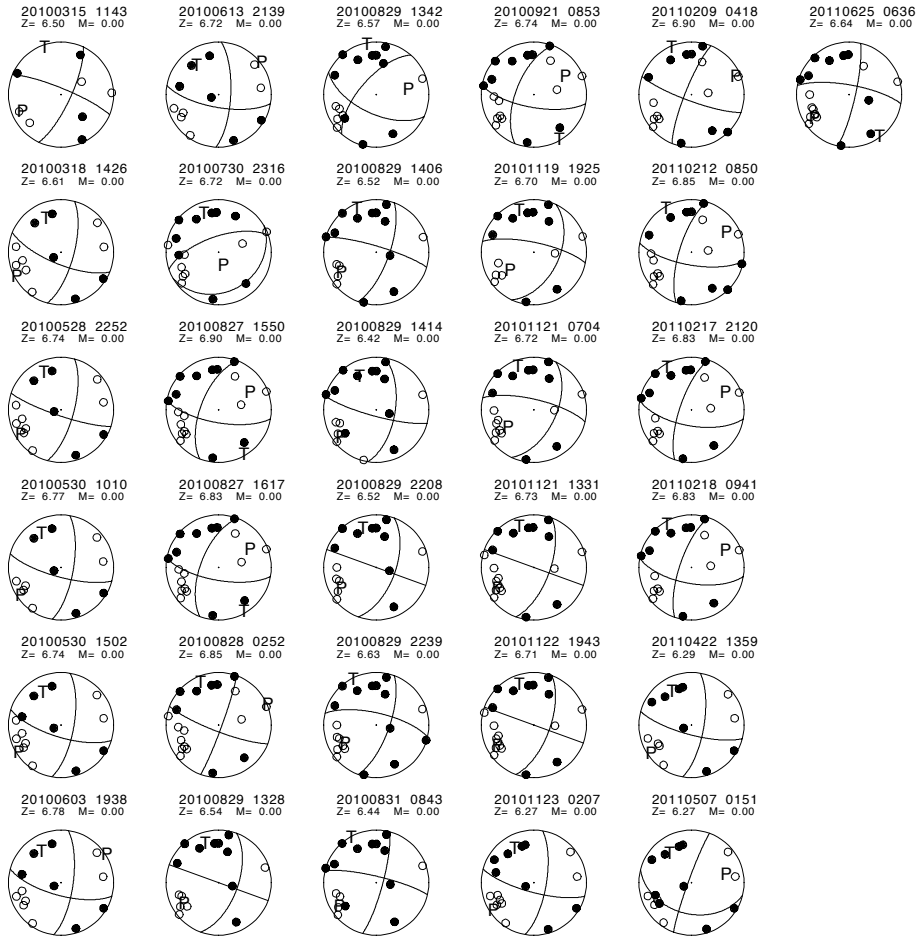

# (c) Cluster C

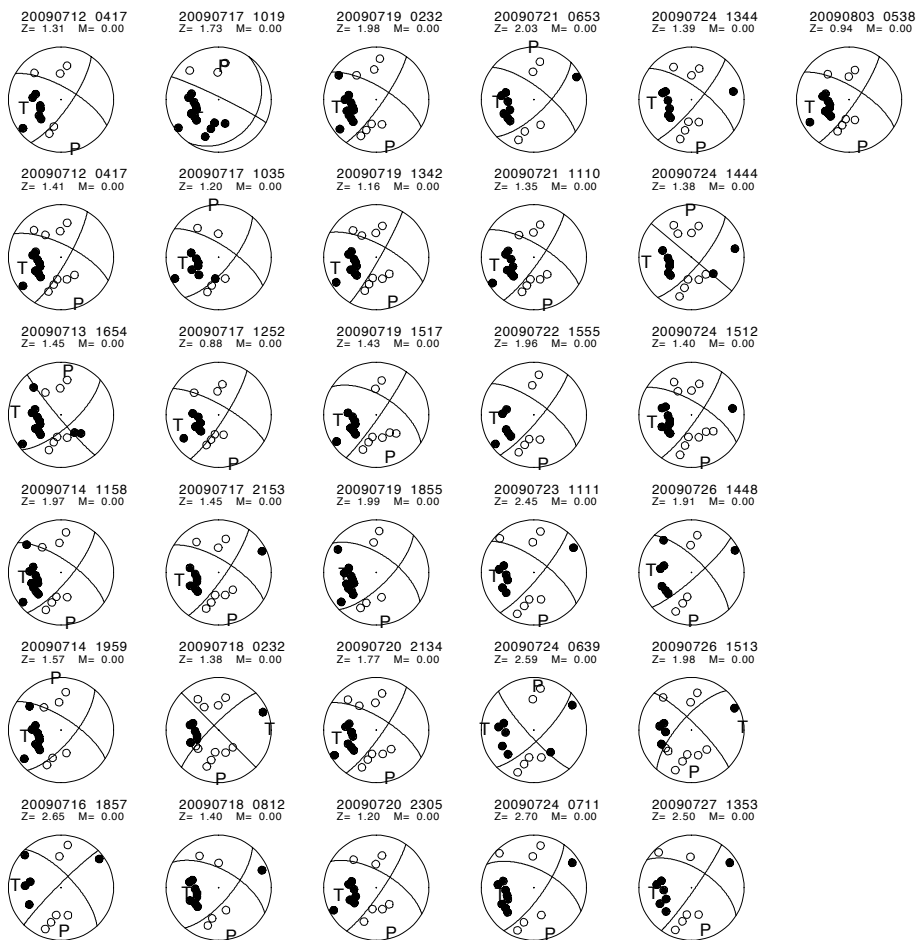

Supplement: ggt184_Supplementary_Data.zip [file ggt184_Supplementary_Data.zip › SuppMat_Figures.pdf]
