# Supplementary material for: Triggering of microearthquakes in Iceland by volatiles released from a dyke intrusion
Source: Oxford University Press journal article supplement (doi:10.1093/gji/ggt184), 2013-06-03
Supplement: ggt184_Supplementary_Data.zip [file ggt184_Supplementary_Data.zip]

Archive with 6 entries (6 files):
- Movie3.avi
- Movie2.avi
- Movie1.avi
- SuppMat_Tables.pdf
- SuppMat_MovieCaptions.pdf
- SuppMat_Figures.pdf
