# Supplementary material for: Triggering of microearthquakes in Iceland by volatiles released from a dyke intrusion
Source: Oxford University Press journal article supplement (doi:10.1093/gji/ggt184), 2013-06-03
Supplement: ggt184_Supplementary_Data.zip [file ggt184_Supplementary_Data.zip › SuppMat_MovieCaptions.pdf]

**Supplementary Movie 1.** The migration of microseismic hypocentres (determined from manually-refined time picks and double-difference relocation) along the dip direction of the inferred dyke plane and looking along strike. The hypocentres shown here represent the same events as those shown in Fig. 2 in the main text. The dyke plane is delineated by the deep hypocentres (green points) and has a strike direction of  $074^{\circ}$ . The orange points represent events from cluster A overhead of the dyke, the blue points represent events from cluster B at the brittle-ductile boundary, and the red points represent events from cluster C at shallow depths. The date of each event appears at the side of the movie figure as each event is added in succession. See also Fig. 2 in the main text and Supp. Movie 2.

**Supplementary Movie 2.** The migration of microseismic hypocentres along the strike direction of the inferred dyke plane ( $074^{\circ}$ ). Events, colour labels, and the orientation of the dyke plane are the same as in Fig. 2 in the main text. See also Supp. Movie 1.

**Supplementary Movie 3.** The migration of epicentres from the shallow cluster C through time. The dashed line represents a linear best-fit to the epicentral locations, which is consistent with the mean fault plane from all events (see Fig. 5b in the main text). The date of each event is shown in succession at the edge of the movie figure, as well as at the end of the movie as a colour bar. Events appear as red points when they are added; events that have already occurred appear as blue points.
