# Supplementary material for: Triggering of microearthquakes in Iceland by volatiles released from a dyke intrusion
Source: Oxford University Press journal article supplement (doi:10.1093/gji/ggt184), 2013-06-03
Supplement: ggt184_Supplementary_Data.zip [file ggt184_Supplementary_Data.zip › SuppMat_Tables.pdf]

| Name | Network | Latitude (°N) | Longitude (°W) | Elevation (m) | Deployed    |
|------|---------|---------------|----------------|---------------|-------------|
| DDAL | CAM     | 65.07739      | 16.93341       | 801           | 2007-2011*  |
| DYNG | CAM     | 65.05191      | 16.64809       | 957           | summer 2007 |
| FJAL | CAM     | 65.00945      | 17.03759       | 837           | 2008-2011   |
| FLAT | CAM     | 65.18279      | 16.49796       | 728           | 2010-2011   |
| FLUR | CAM     | 64.84354      | 17.02693       | 838           | 2010-2011   |
| FREF | CAM     | 65.35190      | 16.28355       | 533           | 2007-2011*  |
| HELI | CAM     | 65.19875      | 16.21843       | 491           | 2007-2011*  |
| HERD | CAM     | 65.18157      | 16.39731       | 686           | summer 2007 |
| HETO | CAM     | 65.12872      | 16.31695       | 582           | summer 2007 |
| HOTT | CAM     | 65.04748      | 16.52985       | 718           | 2007-2011*  |
| HRIM | CAM     | 64.89633      | 16.97921       | 849           | 2010-2011   |
| HRUR | CAM     | 65.15577      | 16.67551       | 697           | 2010-2011   |
| HRUT | CAM     | 65.15576      | 16.67443       | 701           | summer 2007 |
| JOAF | CAM     | 65.11055      | 16.24406       | 548           | summer 2007 |
| KOLL | CAM     | 65.29024      | 16.56726       | 593           | 2007-2011   |
| LOKA | CAM     | 65.15699      | 16.82042       | 734           | 2007-2011   |
| MIDF | CAM     | 65.08676      | 16.32961       | 572           | 2007-2011*  |
| MOFO | CAM     | 64.98440      | 16.65119       | 702           | 2007-2011*  |
| MYVO | CAM     | 65.15550      | 16.36895       | 639           | 2007-2011   |
| RODG | CAM     | 64.98513      | 16.88639       | 1022          | 2007-2011   |
| SVAD | CAM     | 65.11746      | 16.57498       | 680           | 2007-2011*  |
| TOHR | CAM     | 64.91658      | 16.78473       | 715           | 2008-2011   |
| TOLI | CAM     | 65.10336      | 16.11953       | 537           | 2010-2011   |
| UTYR | CAM     | 65.03605      | 16.31867       | 623           | 2007-2011   |
| VADA | CAM     | 64.99487      | 16.53817       | 673           | 2007-2011*  |
| VEGG | CAM     | 65.38205      | 16.37467       | 507           | 2010-2011   |
| VIBR | CAM     | 65.06619      | 16.73256       | 1110          | 2007-2009*  |
| VIKR | CAM     | 65.07474      | 16.51347       | 718           | 2007-2009*  |
| VISA | CAM     | 65.06901      | 16.40369       | 640           | 2007-2009*  |
| ADA  | SIL     | 65.01883      | 15.05745       | 443           | 2007-2011   |
| BRU  | SIL     | 64.82883      | 16.08850       | 751           | 2007-2011   |
| HVA  | SIL     | 64.95466      | 15.86933       | 703           | 2007-2011   |
| KRE  | SIL     | 64.78367      | 16.38283       | 760           | 2007-2011   |
| MKO  | SIL     | 64.97833      | 16.33833       | 690           | 2007-2011   |
| VSH  | SIL     | 64.80783      | 15.72767       | 860           | 2007-2011   |

**Supplementary Table 1.**

List of seismic stations active during separate portions of our study period (2007-2011). Asterisks indicate stations that were inactive during the winter of 2007-2008. CAM refers to the network run by Cambridge University and SIL refers to permanent stations run by the Icelandic Meteorological Office. Latitude and longitude assume the WGS84 geoid.

| Depth (km) | $V_P \left( \frac{\text{m}}{\text{s}} \right)$ | $V_S \left( \frac{\text{m}}{\text{s}} \right)$ | Density $\left( \frac{\text{kg}}{\text{m}^3} \right)$ |
|------------|------------------------------------------------|------------------------------------------------|-------------------------------------------------------|
| -1.2       | 2400                                           | 1364                                           | 2087                                                  |
| -0.7       | 2500                                           | 1420                                           | 2127                                                  |
| -0.4       | 3000                                           | 1705                                           | 2279                                                  |
| 0.5        | 3700                                           | 2102                                           | 2399                                                  |
| 1.5        | 4400                                           | 2500                                           | 2468                                                  |
| 2.5        | 4900                                           | 2784                                           | 2586                                                  |
| 3.5        | 5400                                           | 3068                                           | 2699                                                  |
| 5.0        | 5700                                           | 3239                                           | 2757                                                  |
| 8.0        | 6600                                           | 3750                                           | 2901                                                  |
| 15.0       | 6700                                           | 3807                                           | 2935                                                  |
| 25.0       | 7100                                           | 4034                                           | 3064                                                  |
| 100.0      | 8000                                           | 4550                                           | 3308                                                  |

**Supplementary Table 2.**

Values of seismic wave velocity and density with depth, used for hypocentre location and finite-element modelling. See also Fig. 3 in the main text.

| Depth (km) | Left-Lateral Slip (cm) | Fault Opening (cm) |
|------------|------------------------|--------------------|
| 13.0       | 0                      | 0                  |
| 14.0       | 20                     | 20                 |
| 15.0       | 40                     | 60                 |
| 15.5       | 50                     | 100                |
| 16.0       | 50                     | 100                |
| 16.5       | 50                     | 100                |
| 17.0       | 40                     | 60                 |
| 18.0       | 20                     | 20                 |
| 19.0       | 0                      | 0                  |

**Supplementary Table 3.**

Spatial database file used to impose initial displacements on the modelled dyke.

Displacements and dyke geometry are based on a combination of seismic and geodetic surveys of the Upptyppingar area during the intrusion (Hooper et al. 2011; White et al. 2011).

| Name | Latitude<br>(°N) | Longitude<br>(°W) | East ( $\frac{\text{mm}}{\text{a}}$ ) |          | North ( $\frac{\text{mm}}{\text{a}}$ ) |          | Vertical ( $\frac{\text{mm}}{\text{a}}$ ) |
|------|------------------|-------------------|---------------------------------------|----------|----------------------------------------|----------|-------------------------------------------|
|      |                  |                   | Observed                              | Modelled | Observed                               | Modelled | Modelled                                  |
| BRUJ | 64.829           | 16.088            | 6.3                                   | 6.6      | -23.3                                  | -27.7    | 11.0                                      |
| HEBL | 65.180           | 16.210            | 0.7                                   | -1.3     | -7.4                                   | -0.2     | -1.1                                      |
| KREP | 65.100           | 16.171            | -3.4                                  | -0.4     | -2.3                                   | 3.1      | 3.3                                       |
| LIND | 64.882           | 16.311            | -1.0                                  | -3.5     | -22.7                                  | -19.6    | 13.0                                      |
| UPP3 | 64.995           | 16.256            | -20.4                                 | -3.9     | -12.2                                  | -9.4     | 32.0                                      |
| VIKD | 65.071           | 15.951            | 10.7                                  | 14.3     | 6.5                                    | 4.8      | 20.1                                      |
| ALFD | 64.984           | 16.034            | 27.6                                  | 26.1     | -25.5                                  | -25.6    | 52.6                                      |

**Supplementary Table 4.**

Observed and predicted surface displacements at the locations of seven GPS stations near to Mount Upptyppingar over the course of the dyke intrusion in the mid-crust. Observed displacements are reproduced from Hooper et al. 2011 for comparison with our modelled values. See also Fig. 8 in the main text.
